# Supplementary material for: Effect on Nutritional and Functional Characteristics by Encapsulating Rose canina Powder in Enriched Corn Extrudates
Source: MDPI journal article supplement (doi:10.3390/foods10102401), 2021-10-11
Supplement: s1 [file s1]

**Table S1.** Mean values (and standard deviations) of phenolic acids ( $\mu\text{g/g}_{\text{dry weight}}$ ) of corn mixtures and extrudates.

| Samples           | Caffeic Acid                   | Siringic Acid               | p-Coumaric Acid             | Ferulic Acid                | Di-caff                     | Total Phenolic Acids         |
|-------------------|--------------------------------|-----------------------------|-----------------------------|-----------------------------|-----------------------------|------------------------------|
| <b>Mixtures</b>   |                                |                             |                             |                             |                             |                              |
| CM                | 20.84 (0.06) <sup>aA</sup>     | 14.26 (0.07) <sup>aA</sup>  | 64.75 (0.21) <sup>aA</sup>  | 42.86 (0.04) <sup>aA</sup>  | 58.61 (0.06) <sup>aA</sup>  | 201.32 (0.44) <sup>aA</sup>  |
| R4M               | 18.44 (0.26) <sup>bA</sup>     | 13.31 (0.08) <sup>bA</sup>  | 61.95 (0.05) <sup>bA</sup>  | 31.30 (0.09) <sup>bB</sup>  | 44.47 (0.03) <sup>bB</sup>  | 169.48 (0.78) <sup>bB</sup>  |
| MDR4M             | 17.99 (0.03) <sup>cA</sup>     | 13.22 (0.02) <sup>bcA</sup> | 61.56 (0.03) <sup>dA</sup>  | 31.00 (0.12) <sup>dB</sup>  | 44.22 (0.51) <sup>bB</sup>  | 167.98 (0.71) <sup>cdB</sup> |
| RMDR4M            | 18.10 (0.32) <sup>cA</sup>     | 13.14 (0.06) <sup>cA</sup>  | 61.21 (0.02) <sup>eA</sup>  | 30.83 (0.22) <sup>eB</sup>  | 44.09 (0.05) <sup>bB</sup>  | 167.38 (0.67) <sup>eB</sup>  |
| PPR4M             | 18.14 (0.08) <sup>bcA</sup>    | 13.16 (0.28) <sup>cA</sup>  | 61.76 (0.06) <sup>cA</sup>  | 31.13 (0.05) <sup>cB</sup>  | 44.27 (0.03) <sup>bB</sup>  | 168.46 (0.50) <sup>cB</sup>  |
| CDR4M             | 18.10 (0.20) <sup>cA</sup>     | 13.19 (0.02) <sup>bcA</sup> | 61.54 (0.04) <sup>dA</sup>  | 30.82 (0.34) <sup>eB</sup>  | 44.09 (0.09) <sup>bB</sup>  | 167.73 (0.69) <sup>deB</sup> |
| R8M               | 17.34 (0.07) <sup>dA</sup>     | 12.91 (0.08) <sup>dA</sup>  | 59.55 (0.13) <sup>fgA</sup> | 29.49 (0.13) <sup>fB</sup>  | 42.93 (0.02) <sup>cdB</sup> | 162.22 (0.43) <sup>fB</sup>  |
| MDR8M             | 17.20 (0.13) <sup>dA</sup>     | 12.77 (0.05) <sup>eA</sup>  | 59.56 (0.02) <sup>fgA</sup> | 29.22 (0.07) <sup>gB</sup>  | 42.84 (0.08) <sup>cdB</sup> | 161.58 (0.35) <sup>gB</sup>  |
| RMDR8M            | 17.12 (0.05) <sup>dB</sup>     | 12.62 (0.16) <sup>efA</sup> | 59.40 (0.15) <sup>ghA</sup> | 29.03 (0.08) <sup>hB</sup>  | 42.74 (0.02) <sup>dB</sup>  | 160.90 (0.46) <sup>hB</sup>  |
| PPR8M             | 17.02 (0.09) <sup>dB</sup>     | 12.32 (0.03) <sup>fA</sup>  | 59.38 (0.09) <sup>hA</sup>  | 29.05 (0.23) <sup>hB</sup>  | 43.34 (0.84) <sup>cB</sup>  | 161.10 (1.28) <sup>ghB</sup> |
| CDR8M             | 17.11 (0.08) <sup>dB</sup>     | 12.65 (0.05) <sup>gA</sup>  | 59.59 (0.03) <sup>fA</sup>  | 28.99 (0.78) <sup>hB</sup>  | 42.70 (0.15) <sup>dB</sup>  | 161.05 (1.09) <sup>ghB</sup> |
| <b>Extrudates</b> |                                |                             |                             |                             |                             |                              |
| CE                | 18.46 (0.22) <sup>aB</sup>     | 12.43 (0.04) <sup>aB</sup>  | 60.36 (0.05) <sup>aB</sup>  | 32.52 (0.23) <sup>dB</sup>  | 46.79 (0.40) <sup>eB</sup>  | 170.56 (0.94) <sup>fA</sup>  |
| R4E               | 18.28 (0.07) <sup>abA</sup>    | 11.86 (0.07) <sup>bB</sup>  | 57.73 (0.13) <sup>bB</sup>  | 37.92 (0.24) <sup>aA</sup>  | 53.56 (0.12) <sup>aA</sup>  | 179.35 (0.63) <sup>aA</sup>  |
| MDR4E             | 18.19 (0.08) <sup>abcA</sup>   | 11.63 (0.02) <sup>cdB</sup> | 57.75 (0.07) <sup>bB</sup>  | 37.76 (0.08) <sup>abA</sup> | 53.31 (0.13) <sup>aA</sup>  | 178.65 (0.38) <sup>abA</sup> |
| RMDR4E            | 18.09 (0.06) <sup>abcdeA</sup> | 11.69 (0.07) <sup>cB</sup>  | 57.76 (0.04) <sup>bB</sup>  | 37.78 (0.08) <sup>abA</sup> | 53.26 (0.22) <sup>abA</sup> | 178.58 (0.47) <sup>abA</sup> |
| PPR4E             | 18.14 (0.09) <sup>abcdA</sup>  | 11.59 (0.02) <sup>deB</sup> | 57.48 (0.11) <sup>cB</sup>  | 37.81 (0.07) <sup>aA</sup>  | 53.31 (0.33) <sup>aA</sup>  | 178.33 (0.62) <sup>bA</sup>  |
| CDR4E             | 18.01 (0.08) <sup>abcdeA</sup> | 11.45 (0.04) <sup>fgB</sup> | 57.36 (0.15) <sup>dB</sup>  | 37.60 (0.09) <sup>bA</sup>  | 52.71 (0.66) <sup>bA</sup>  | 177.13 (1.02) <sup>cA</sup>  |
| R8E               | 18.24 (0.60) <sup>abcA</sup>   | 11.51 (0.22) <sup>efB</sup> | 55.35 (0.04) <sup>fB</sup>  | 36.62 (0.13) <sup>cA</sup>  | 51.91 (0.07) <sup>cA</sup>  | 173.63 (0.52) <sup>dA</sup>  |
| MDR8E             | 17.63 (0.16) <sup>eA</sup>     | 11.47 (0.03) <sup>fgB</sup> | 55.37 (0.08) <sup>efB</sup> | 36.65 (0.22) <sup>cA</sup>  | 51.63 (0.23) <sup>cdA</sup> | 172.74 (0.72) <sup>deA</sup> |
| RMDR8E            | 17.67 (0.15) <sup>deA</sup>    | 11.38 (0.07) <sup>gB</sup>  | 55.46 (0.07) <sup>eB</sup>  | 36.73 (0.31) <sup>cA</sup>  | 51.50 (0.22) <sup>cdA</sup> | 172.75 (0.82) <sup>deA</sup> |
| PPR8E             | 17.76 (0.02) <sup>cdeA</sup>   | 11.47 (0.03) <sup>fB</sup>  | 55.20 (0.15) <sup>gB</sup>  | 36.54 (0.15) <sup>cA</sup>  | 51.17 (0.07) <sup>dA</sup>  | 172.14 (0.42) <sup>eA</sup>  |
| CDR8E             | 17.83 (0.03) <sup>bcdeA</sup>  | 11.51 (0.12) <sup>efB</sup> | 55.41 (0.02) <sup>efB</sup> | 36.60 (0.06) <sup>cA</sup>  | 51.43 (0.02) <sup>cdA</sup> | 172.78 (0.25) <sup>deA</sup> |

Small different letters in superscript within column indicates significant changes between samples, by Fisher test ( $p < 0.05$ ) comparing studied samples in mixtures or extrudates. Big different letter within column indicates significant changes between samples, by Fisher test ( $p < 0.05$ ) comparing mixtures and extrudates.

R, rosehip; MDR, maltodextrin rosehip; RMDR, resistant maltodextrin rosehip; PPR, pea protein rosehip; CDR, cyclodextrin rosehip. 4, concentration of 4 % of rosehip preparation; 8, concentration of 8 % of rosehip preparation. M, mixture; E, extrudate.

**Table S2.** Mean values (and standard deviations) of hydroxybenzoic acid (Di-Gallic acid) and flavanols content ( $\mu\text{g/g}_{\text{dry weight}}$ ) of corn mixtures and extrudates.

| Samples    | Di-Gall                     | Procyan d1                  | Procyan d2                  | Cat                         | Q-acet-rham                | I-glucur                   | Q-gluc                     | Q-glu-gluc-rham              | I-gluc                     | I-acet-gluc-gluc           | Q                          | Total Flavonoids             |
|------------|-----------------------------|-----------------------------|-----------------------------|-----------------------------|----------------------------|----------------------------|----------------------------|------------------------------|----------------------------|----------------------------|----------------------------|------------------------------|
| Mixtures   |                             |                             |                             |                             |                            |                            |                            |                              |                            |                            |                            |                              |
| CM         | $\bar{a}_k$                 | $\bar{a}_k$                 | $\bar{a}_j$                 | $\bar{a}_k$                 | $\bar{a}_h$                | $\bar{a}_i$                | $\bar{a}_k$                | $\bar{a}_h$                  | $\bar{a}_i$                | $\bar{a}_j$                | $\bar{a}_k$                | $\bar{a}_k$                  |
| R4M        | 187.14 (0.41) <sup>gB</sup> | 38.62 (0.04) <sup>gA</sup>  | 23.21 (0.06) <sup>fA</sup>  | 182.44 (0.07) <sup>gA</sup> | 20.92 (0.04) <sup>fA</sup> | 13.74 (0.08) <sup>fA</sup> | 18.29 (0.03) <sup>gA</sup> | 18.33 (0.08) <sup>dB</sup>   | 19.96 (0.08) <sup>eB</sup> | 17.62 (0.12) <sup>gB</sup> | 15.98 (0.25) <sup>fA</sup> | 558.11 (1.26) <sup>fA</sup>  |
| MDR4M      | 146.19 (0.32) <sup>iA</sup> | 37.34 (0.02) <sup>hA</sup>  | 22.80 (0.15) <sup>gA</sup>  | 183.14 (0.12) <sup>fA</sup> | 23.51 (0.02) <sup>eA</sup> | 13.73 (0.05) <sup>fA</sup> | 16.35 (0.07) <sup>iB</sup> | 18.00 (0.09) <sup>eB</sup>   | 20.26 (0.50) <sup>eB</sup> | 14.93 (0.02) <sup>iB</sup> | 14.93 (0.08) <sup>jA</sup> | 515.18 (1.44) <sup>hA</sup>  |
| RMDR4M     | 124.43 (0.07) <sup>iA</sup> | 25.25 (0.03) <sup>iA</sup>  | 22.63 (0.04) <sup>ghA</sup> | 123.44 (0.12) <sup>jA</sup> | 20.55 (0.05) <sup>gA</sup> | 12.84 (0.23) <sup>hA</sup> | 18.27 (0.04) <sup>gB</sup> | 16.67 (0.05) <sup>gB</sup>   | 18.29 (0.45) <sup>gB</sup> | 18.90 (0.07) <sup>fA</sup> | 15.32 (0.03) <sup>iA</sup> | 416.59 (1.04) <sup>jA</sup>  |
| PPR4M      | 194.90 (0.06) <sup>iB</sup> | 27.1 (0.3) <sup>iA</sup>    | 22.14 (0.07) <sup>iA</sup>  | 131.05 (0.04) <sup>jA</sup> | 20.56 (0.03) <sup>gA</sup> | 13.34 (0.02) <sup>gA</sup> | 19.23 (0.02) <sup>iB</sup> | 16.62 (0.02) <sup>gB</sup>   | 14.66 (0.02) <sup>hB</sup> | 16.29 (0.34) <sup>hB</sup> | 15.64 (0.02) <sup>hA</sup> | 491.46 (0.92) <sup>iA</sup>  |
| CDR4M      | 175.02 (0.06) <sup>hB</sup> | 40.70 (0.04) <sup>fA</sup>  | 22.41 (0.13) <sup>hA</sup>  | 165.04 (0.02) <sup>hA</sup> | 20.55 (0.09) <sup>gA</sup> | 13.72 (0.09) <sup>fA</sup> | 17.59 (0.05) <sup>iB</sup> | 17.59 (0.55) <sup>iB</sup>   | 19.51 (0.34) <sup>iB</sup> | 17.93 (0.77) <sup>gB</sup> | 16.59 (0.33) <sup>gA</sup> | 526.65 (2.47) <sup>gA</sup>  |
| R8M        | 736.79 (0.69) <sup>aA</sup> | 148.0 (0.3) <sup>aA</sup>   | 205.2 (0.2) <sup>aA</sup>   | 361.40 (0.02) <sup>aA</sup> | 31.98 (0.04) <sup>aA</sup> | 21.23 (0.08) <sup>aA</sup> | 44.40 (0.04) <sup>aA</sup> | 28.42 (0.08) <sup>bB</sup>   | 32.22 (0.09) <sup>aB</sup> | 27.77 (0.08) <sup>aB</sup> | 23.49 (0.04) <sup>eA</sup> | 1660.86 (1.69) <sup>aA</sup> |
| MDR8M      | 643.42 (0.13) <sup>bA</sup> | 120.60 (0.08) <sup>bA</sup> | 204.2 (0.2) <sup>bA</sup>   | 319.04 (0.05) <sup>cA</sup> | 29.05 (0.03) <sup>cA</sup> | 20.49 (0.05) <sup>cA</sup> | 39.83 (0.03) <sup>bA</sup> | 31.67 (0.04) <sup>aA</sup>   | 29.60 (0.11) <sup>cA</sup> | 26.75 (0.55) <sup>bB</sup> | 29.05 (0.52) <sup>aA</sup> | 1493.64 (1.84) <sup>bA</sup> |
| RMDR8M     | 496.38 (0.28) <sup>eA</sup> | 80.9 (0.3) <sup>eA</sup>    | 120.42 (0.03) <sup>eA</sup> | 287.65 (0.02) <sup>eA</sup> | 30.66 (0.03) <sup>bA</sup> | 20.79 (0.06) <sup>bA</sup> | 37.83 (0.08) <sup>cA</sup> | 28.41 (0.09) <sup>bB</sup>   | 29.60 (0.05) <sup>cB</sup> | 25.80 (0.09) <sup>dB</sup> | 28.68 (0.37) <sup>bA</sup> | 1187.11 (1.37) <sup>eA</sup> |
| PPR8M      | 507.93 (0.14) <sup>dA</sup> | 116.17 (0.08) <sup>cA</sup> | 168.61 (0.04) <sup>cA</sup> | 325.95 (0.37) <sup>bA</sup> | 28.99 (0.54) <sup>cA</sup> | 14.67 (0.08) <sup>eA</sup> | 37.12 (0.09) <sup>dA</sup> | 31.59 (0.03) <sup>aB</sup>   | 28.98 (0.03) <sup>dB</sup> | 26.39 (0.05) <sup>cB</sup> | 27.02 (0.65) <sup>cA</sup> | 1313.42 (2.10) <sup>dA</sup> |
| CDR8M      | 565.81 (0.21) <sup>cA</sup> | 108.88(0.02) <sup>dA</sup>  | 155.16 (0.02) <sup>dA</sup> | 317.55 (0.02) <sup>dA</sup> | 24.42 (0.13) <sup>dA</sup> | 14.96 (0.02) <sup>dA</sup> | 29.98 (0.03) <sup>eB</sup> | 23.78 (0.02) <sup>cB</sup>   | 30.31 (0.02) <sup>bA</sup> | 24.44 (0.03) <sup>eA</sup> | 26.07 (0.04) <sup>dA</sup> | 1321.36 (0.56) <sup>cA</sup> |
| Extrudates |                             |                             |                             |                             |                            |                            |                            |                              |                            |                            |                            |                              |
| CE         | $\bar{a}_j$                 | -                           | -                           | -                           | -                          | -                          | $\bar{a}_k$                | $\bar{a}_j$                  | $\bar{a}_g$                | $\bar{a}_j$                | -                          | $\bar{a}_k$                  |
| R4E        | 211.76 (0.34) <sup>eA</sup> | n.d.                        | n.d.                        | n.d.                        | n.d.                       | n.d.                       | 17.02 (0.02) <sup>iB</sup> | 31.66 (0.07) <sup>eA</sup>   | 29.13 (0.04) <sup>eA</sup> | 19.83 (0.03) <sup>gA</sup> | 0.00 <sup>B</sup>          | 309.40 (0.5) <sup>iB</sup>   |
| MDR4E      | 116.65 (0.02) <sup>hB</sup> | n.d.                        | n.d.                        | n.d.                        | n.d.                       | n.d.                       | 19.56 (0.05) <sup>hA</sup> | 27.11 (0.55) <sup>hA</sup>   | 26.01 (0.06) <sup>fA</sup> | 16.12 (0.02) <sup>jA</sup> | 0.00 <sup>B</sup>          | 205.46 (0.7) <sup>iB</sup>   |
| RMDR4E     | 113.74 (0.73) <sup>jB</sup> | n.d.                        | n.d.                        | n.d.                        | n.d.                       | n.d.                       | 23.59 (0.23) <sup>gA</sup> | 28.27 (0.03) <sup>fghA</sup> | 27.97 (0.38) <sup>eA</sup> | 16.46 (0.04) <sup>iB</sup> | 0.00 <sup>B</sup>          | 210.03 (1.41) <sup>iB</sup>  |
| PPR4E      | 221.73 (0.18) <sup>dA</sup> | n.d.                        | n.d.                        | n.d.                        | n.d.                       | n.d.                       | 25.96 (0.34) <sup>eA</sup> | 36.80 (0.78) <sup>cA</sup>   | 31.47 (0.78) <sup>dA</sup> | 23.97 (0.65) <sup>fA</sup> | 0.00 <sup>B</sup>          | 339.93 (2.39) <sup>dB</sup>  |
| CDR4E      | 196.45 (0.08) <sup>fA</sup> | n.d.                        | n.d.                        | n.d.                        | n.d.                       | n.d.                       | 28.54 (0.04) <sup>dA</sup> | 27.82 (0.03) <sup>ghA</sup>  | 28.45 (0.56) <sup>eA</sup> | 18.85 (0.05) <sup>hA</sup> | 0.00 <sup>B</sup>          | 300.03 (0.76) <sup>hB</sup>  |
| R8E        | 339.13 (0.34) <sup>bB</sup> | n.d.                        | n.d.                        | n.d.                        | n.d.                       | n.d.                       | 33.09 (0.08) <sup>bB</sup> | 39.56 (0.22) <sup>bA</sup>   | 40.05 (0.22) <sup>bA</sup> | 34.30 (0.67) <sup>bA</sup> | 0.00 <sup>B</sup>          | 486.15 (1.53) <sup>bB</sup>  |

Table S2.Cont.

| Samples    | Di-Gall                     | Procyan d | Procyan d | Cat  | Q-acet-rham | I-glucur | Q-gluc                     | Q-glu-gluc-rham            | I-gluc                     | I-acet-gluc-gluc           | Q                 | Total flavonoids            |
|------------|-----------------------------|-----------|-----------|------|-------------|----------|----------------------------|----------------------------|----------------------------|----------------------------|-------------------|-----------------------------|
| Extrudates |                             |           |           |      |             |          |                            |                            |                            |                            |                   |                             |
| MDR8E      | 196.82 (0.17) <sup>iB</sup> | n.d.      | n.d.      | n.d. | n.d.        | n.d.     | 25.35 (0.06) <sup>iB</sup> | 24.43 (0.19) <sup>iB</sup> | 29.09 (0.34) <sup>eA</sup> | 28.78 (0.04) <sup>cA</sup> | 0.00 <sup>B</sup> | 304.46 (0.8) <sup>gB</sup>  |
| RMDR8E     | 193.62 (0.04) <sup>gB</sup> | n.d.      | n.d.      | n.d. | n.d.        | n.d.     | 25.09 (0.45) <sup>iB</sup> | 34.76 (0.34) <sup>dA</sup> | 34.70 (0.05) <sup>cA</sup> | 26.65 (0.76) <sup>dA</sup> | 0.00 <sup>B</sup> | 314.81 (1.64) <sup>eB</sup> |
| PPR8E      | 369.69 (0.02) <sup>aB</sup> | n.d.      | n.d.      | n.d. | n.d.        | n.d.     | 36.92 (0.57) <sup>aA</sup> | 43.47 (0.67) <sup>aA</sup> | 45.55 (1.06) <sup>aA</sup> | 37.78 (0.99) <sup>aA</sup> | 0.00 <sup>B</sup> | 533.40 (0.75) <sup>aB</sup> |
| CDR8E      | 333.02 (0.09) <sup>cB</sup> | n.d.      | n.d.      | n.d. | n.d.        | n.d.     | 31.60 (0.03) <sup>cA</sup> | 28.81 (0.94) <sup>fA</sup> | 25.38 (0.02) <sup>iB</sup> | 23.86 (0.05) <sup>iB</sup> | 0.00 <sup>B</sup> | 442.68 (0.23) <sup>cB</sup> |

Small different letters in superscript within column indicates significant changes between samples, by Fisher test ( $p < 0.05$ ) comparing studied samples in mixtures or extrudates. Big different letter within column indicates significant changes between samples, by Fisher test ( $p < 0.05$ ), comparing mixtures and extrudates. R, rosehip; MDR, maltodextrin rosehip; RMDR, resistant maltodextrin rosehip; PPR, pea protein rosehip; CDR, cyclodextrin rosehip. 4, concentration of 4 % of rosehip preparation; 8, concentration of 8 % of rosehip preparation. M, mixture; E, extrudate. Di-Gall: Di-Gallic acid; Procyan d1: Procyanidin dimmer 1; Procyan d2: Procyanidin dimmer 2; Cat: Catechin; Q-acet-rham: Quercetin-acetyl-rhamnoside; I-glucur: Isorhamnetin-glucuronide; Q-gluc: Quercetin-glucoside; Q-glu-gluc-rham: Quercetin-glucosyl-glucosyl-rhamnoside; I-gluc: Isorhamnetin-glucoside; I-acet-gluc-gluc: Isorhamnetin-acetyl-glucosyl-glucoside; Q: Quercetin; n.d. – not detected.
